# Supplementary material
Source: publisher figshare collection journal article supplement (https://gsapubs.figshare.com/articles/dataset/_/12921578)
Supplement: Supplementary file 1 [file 1]

Supplementary Materials for

Implications of Giant Ooids for the Carbonate Chemistry of  
Early Triassic Seawater

**Xiaowei Li<sup>1</sup>, Elizabeth J. Trower<sup>2</sup>, Daniel J. Lehrmann<sup>3</sup>, Marcello Minzoni<sup>4</sup>, Brian M. Kelley<sup>5</sup>, Ellen K. Schaal<sup>6</sup>, Demir Altiner<sup>7</sup>, Meiyi Yu<sup>8</sup>, Jonathan L. Payne<sup>1</sup>**

<sup>1</sup>*Department of Geological Sciences, Stanford University, Stanford, CA 94305, USA;*

<sup>2</sup>*Department of Geological Sciences, University of Colorado Boulder, Boulder, CO 80309, USA*

<sup>3</sup>*Department of Geosciences, Trinity University, San Antonio, TX 78212, USA*

<sup>4</sup>*Department of Geological Sciences, University of Alabama, Tuscaloosa, AL 35487, USA*

<sup>5</sup>*Department of Geosciences, Pennsylvania State University, PA 16802, USA*

<sup>6</sup>*Department of Environmental Science & Studies, DePaul University, Chicago, IL 60604, USA*

<sup>7</sup>*Department of Geological Engineering, Middle East Technical University, Ankara 06800, Turkey*

<sup>8</sup>*Department of Resources & Environmental Engineering, Guizhou University, Guiyang, Guizhou 550025, PRC*

This study applies a physicochemical model for ooid formation described in Trower et al. (2017) to determine the range of seawater conditions compatible with the formation of giant ooids (>2 mm in diameter) during Early Triassic time. Because the model is already published, we focus here on the selection of boundary conditions (i.e., parameter values) used in this study, which includes a broader exploration of parameter space than conducted by Trower et al. (2017).

The supplementary materials include six supporting subsections (Text S1 to S6), six supporting figures (Figures S1 to S6), and one supporting table (Table S1).

## **TEXT S1. GEOLOGIC SETTING AND AGES OF SAMPLES**

The Great Bank of Guizhou (GBG) initiated in the latest Permian, Changhsingian, on antecedent topography inherited from the south-facing shelf margin of the Yangtze Platform (YP) composed of sponge-microbialite boundstone (Fig. S1A; Lehrmann et al., 1998; Li et al., 2012). By the end of Induan time (252.2 - 251.2 Ma), the GBG was a high-relief platform with oolite shoals developed at the margin and had slopes with approximately 300 m of relief above the adjacent basin floor. Facies in the platform interior grade upward from microbial boundstone to thin-bedded lime mudstone and, subsequently, to peritidal cyclic limestone. Marginal shoal facies comprise oolitic grainstone with subordinate molluscan packstone (Lehrmann et al., 1998; Fig. S1A). Coeval slope facies are composed of shale, punctuated by an upward-increasing occurrence of carbonate debris-flow breccia, carbonate turbidites, and periplatform pelagic lime mudstone. Carbonate breccias and carbonate turbidites were primarily sourced from aggradational oolitic shoals at the platform margin (Lehrmann et al., 1998; Fig. S1A). Continued aggradation of the margin during the Olenekian (251.2 - 247.2 Ma) generated a high-relief (~900 m) carbonate platform with steep, accretionary slope clinoforms (Kelley, 2014; Fig. S1A). Ooid shoals remained common on the platform margin during Olenekian time. The coeval platform interior consists of dolomitized peritidal limestone (Lehrmann et al., 1998; Kelley, 2014). Carbonate debris-flow breccia and carbonate turbidites on the slope contains clasts of margin-derived oolite indicating continued shedding to the slope of oolite material from the margin.

The YP at the Zhenfeng margin consisted of a ramp during the Induan (Fig. S1B; Minzoni et al., 2013). The inner ramp is composed of interbedded lime mudstone and siltstone

with ooid shoals (Fig. S1B). The facies grade basinward into outer ramp mud-dominated facies containing slumps, carbonate turbidites, and debris-flow breccia. The Induan ramp grades upward into a low-relief bank in the Olenekian accompanied by marked progradation and slight aggradation of the ooid shoal complex (Fig. S1B). The Olenekian platform interior consists of subtidal to peritidal cyclic dolomite. Coeval adjacent slope and basin strata primarily consist of lime mudstone and carbonate debris-flow breccia and carbonate turbidites (Fig. S1B; Minzoni et al., 2013).

The Chongzuo-Pingguo Platform (CPP) is the largest isolated platform in the Nanpanjiang Basin (Fig. 1C). The Pingxiang-Dongmen fault offsets the southern margin in the Late Permian and was reactivated during the Cretaceous (Fig. S1C; Lehrmann et al., 2007). In the Early Triassic, the CPP evolved as a low-relief bank with a gentle slope at its flanks. The platform interior is composed primarily of oolitic packstone-grainstone and lime mudstone. A thicker succession of oolite containing giant ooids reflects shoals that formed at the bank margins. The basin-margin slopes are dominated by lime mudstone, carbonate debris-flow breccia and carbonate turbidites. (Fig. S1C).

The ages of samples in this study (middle Griesbachian and middle Dienerian; Fig. 2D) are constrained by carbon isotope chemostratigraphy ( $\delta^{13}\text{C}_{\text{VPDB}} = 3.32\text{‰}$  for sample DXR-3 collected from the GBG,  $\delta^{13}\text{C}_{\text{VPDB}} = 1.5\text{‰}$  for sample M1 from Zhenfeng of the YP; and  $\delta^{13}\text{C}_{\text{VPDB}} = -0.56\text{‰}$  for sample PG-34 that was collected in the upper portion of the Majiaoling Formation (Dienerian) in the CPP reported by Lehrmann et al. 2012) and foraminiferan biostratigraphy (*Postcladella grandis* present in sample M1 from Zhenfeng and *Postcladella* present in sample DXR-3 from the GBG; Fig. S2).

## TEXT S2. ARAGONITE OR CALCITE PRECIPITATION RATE

The aragonite or calcite precipitation rate ( $P$ ) can be expressed as a function of the carbonate saturation state of seawater,  $\Omega$  (Zhong and Mucci, 1989),

$$P = k (\Omega - I)^n, (1)$$

in which the rate constant,  $k$  in  $\mu\text{mol}/\text{m}^2/\text{hr}$ , and the reaction order,  $n$ , can change with solution chemistry, reaction mechanism, and surface properties (Burton and Walter, 1987; Zhong and Mucci, 1989; Morse et al., 2007). The values of  $k$  and  $n$  values are influenced by temperature and salinity; within the range of reasonable values for Triassic seawater, they are more sensitive to temperature than to salinity (Burton and Walter, 1987; Zhong and Mucci, 1989). Therefore, we used values of  $k = 45.1 \mu\text{mol}/\text{m}^2/\text{hr}$  and  $n = 2.4$  for aragonite and  $k = 3.7 \mu\text{mol}/\text{m}^2/\text{hr}$  and  $n = 2.3$  for calcite at  $37^\circ\text{C}$  from Burton and Walter (1987) to predict aragonite and calcite precipitation (Fig. 3). We used these values because the temperature is close to the Early Triassic seawater temperature indicated by oxygen isotope proxy data (Sun et al., 2012). Sensitivity analysis was conducted using values appropriate to  $25^\circ\text{C}$  ( $k = 40.6 \mu\text{mol}/\text{m}^2/\text{hr}$  and  $n = 1.7$  for aragonite and  $k = 3.9 \mu\text{mol}/\text{m}^2/\text{hr}$  and  $n = 1.9$  for calcite) to test how temperature would influence the simulation results (Fig. S4; Burton and Walter, 1987). At lower temperatures, more extreme  $\Omega$  is needed at in order to form ooids of the same sizes due to the slower kinetics of precipitation (see Figure 3 for comparison).

### TEXT S3. PARTICLE SURFACE AREA

Trower et al. (2017) adopted a specific surface area estimate based on measurements of coral particles (Walter and Morse, 1984) because of similarities in surface microstructure between ooids and coral particles:

$$A_{\text{surface}} = 1/6 \pi D^3 * \rho_{\text{ooid}} * SSA, (2)$$

where specific surface area,  $SSA$ , given in  $\text{m}^2/\text{g}$ , is a function of ooid diameter ( $D$ ) and density ( $\rho_{\text{ooid}}$ ). For  $\rho_{\text{ooid}}$ , we used a value equal to the density of aragonite or calcite because petrographic observations indicate that Lower Triassic ooids were bimineralic (Lehrmann et al., 2012; Fig. 2G & H). We used a value of  $SSA = 30.8$  because its corresponding coral particle size is close to the size range of giant ooids in this study (Walter and Morse, 1984).

#### TEXT S4. BED SHEAR VELOCITY

In the modern ocean, ooids commonly occur in high-energy environments where grains are transported near or beyond the threshold of suspension (e.g. Trower et al., 2018). Early Triassic ooid sizes and transport modes can be used to determine likely ranges of bed shear velocity ( $u_*$ ) that would be necessary for giant ooids to be transported in bed load or suspended load. Sediment transport mode can be estimated using the Rouse number,  $P = w_s / (\kappa u_*)$ , where  $w_s$  is settling velocity, calculated following Dietrich (1982), and  $\kappa = 0.41$  is the dimensionless von Karman constant.  $P > 2.5$  corresponds to bed load transport;  $2.5 > P > 1.2$  corresponds to ~50% suspended load transport;  $1.2 > P > 0.8$  corresponds to ~100% suspended load transport; and  $P < 0.8$  corresponds to washload transport. For the largest ooid diameter measured in this study ( $D = 9.3$  mm),  $w_s \approx 0.75$  m/s for ooids composed of aragonite ( $\approx 0.72$  m/s for calcite), and  $P = 1.2$  corresponds with  $u_* = 1.5$  m/s, a conservative upper bound on bed shear velocities in giant ooid-forming environments (Figs. S5 and S6).

Equilibrium ooid size also depends on  $u_*$  due to the offsetting effects of impact frequency (higher for bed load transport) and impact energy (higher for suspended load transport). Because abrasion rate is minimized for  $u_*$  corresponding to the threshold of motion ( $P$  just less than 2.5) due to these effects, equilibrium ooid size is maximized at  $u_*$  closer to or at the threshold of suspension for giant ooids (Figs. S5 and S6). This transport mode-dependent effect on

equilibrium ooid size is generally smaller than the effects of changing  $\Omega$  or  $f$  within the range of plausible values (Figs. S5 and S6).

## **TEXT S5. KINEMATIC VISCOSITY OF EARLY TRIASSIC TROPICAL SURFACE WATER**

In the model of Trower et al. (2017), density and kinematic viscosity of seawater must be specified because they affect sediment transport mode and, therefore, abrasion rate. Density ( $\rho$ , in kg/m<sup>3</sup>), dynamic viscosity ( $\mu$ , in kg/(ms)), and kinematic viscosity ( $\gamma$ , in m<sup>2</sup>/s) of Early Triassic seawater are functions of temperature ( $T$ , °C) and salinity ( $Sal$ , ppm) (El-Dessouky and Ettouney, 2002) as expressed by

$$\rho = 10^3 (A_1 F_1 + A_2 F_2 + A_3 F_3 + A_4 F_4), (3)$$

where

$$A_1 = 4.032219G_1 + 0.115313G_2 + 3.26 * 10^{-4} G_3, (4)$$

$$A_2 = -0.108199G_1 + 1.571*10^{-3}G_2 - 4.23*10^{-4} G_3, (5)$$

$$A_3 = -0.012247G_1 + 1.74*10^{-3}G_2 - 9*10^{-6} G_3, (6)$$

$$A_4 = 6.92*10^{-4}G_1 - 8.7*10^{-5}G_2 - 5.3*10^{-5}G_3, (7)$$

$$F_1 = 0.5, F_2 = A, F_3 = 2A^2 - 1, F_4 = 4A^3 - 3A, (8)$$

$$G_1 = 0.5, G_2 = B, G_3 = 2B^2 - 1, (9)$$

$$A = (2T - 200)/160, (10)$$

$$B = (2Sal/1000 - 150)/150. (11)$$

$A_1$  to  $A_4$ ,  $F_1$  to  $F_4$ ,  $G_1$  to  $G_3$ ,  $A$ , and  $B$  in Equations (3) to (11) above are parameters defining an empirical fit of seawater density as a function of salinity and temperature. Early Triassic surface ocean temperatures in the area of the south China block were in the range of 33 to 38 °C based on the oxygen isotope composition of biogenic apatite from conodont microfossils (Sun et al., 2012). We use 36 °C to represent the average temperature in the Early Triassic in this study because it is generally consistent with the sea surface temperatures in the middle-upper Griesbachian, middle-upper Dienerian, upper Smithian, and upper Spathian (Li et al., 2015; Tian et al., 2015; Fang et al., 2017). Coeval salinity was approximately 41‰ based on data from fluid inclusions in halite (Hay et al., 2006). Therefore, according to Equations (3) to (11),  $\rho$  was approximately 1023.7 kg/m<sup>3</sup>. The modeling results are not substantially affected by the use of any reasonable value for temperature and salinity within the range reported in Sun et al. (2012) and Hay et al. (2006).

The relationship between  $\mu$  and  $\gamma$  is:

$$\gamma = \mu / \rho, (12)$$

$$\mu = (\mu_W)(\mu_R) * 10^{-3}, (13)$$

where:

$$\ln(\mu_W) = -3.79418 + 604.129 / (139.18 + T), (14)$$

$$\mu_R = 1 + C * Sal + D * Sal^2, (15)$$

$$C = 1.474 * 10^{-3} + 1.5 * 10^{-5} T - 3.927 * 10^{-8} T^2, (16)$$

$$D = 1.0734 * 10^{-5} - 8.5 * 10^{-8} T + 2.23 * 10^{-10} T^2. (17)$$

Thus,  $\gamma$  is  $0.756 * 10^{-6} \text{ m}^2/\text{s}$ , according to Equations (12) through (17).

**TEXT S6. CRITICAL SHIELDS STRESS FOR INITIAL SEDIMENT MOTION**

A critical Shields number (0.03) for initial motion of ooids smaller than gravel-size was used in Trower et al. (2017). Because the size of Early Triassic giant ooids in this study ranges from 2 to approximately 9 mm (Fig. 2A to C), we used three different critical Shields numbers for corresponding sizes of giant ooids (Table S1; Berenbrock and Tranmer, 2008).

**TABLE S1. CRITICAL SHIELDS NUMBER VARIES WITH RANGES OF PARTICLE DIAMETERS**

| Particle classification name | Ranges of particle diameters<br>(mm) | Critical Shields number |
|------------------------------|--------------------------------------|-------------------------|
| Medium gravel                | 8 - 16                               | 0.045                   |
| Fine gravel                  | 4 - 8                                | 0.043                   |
| Very fine gravel             | 2 - 4                                | 0.040                   |
| sand                         | <2                                   | 0.030                   |

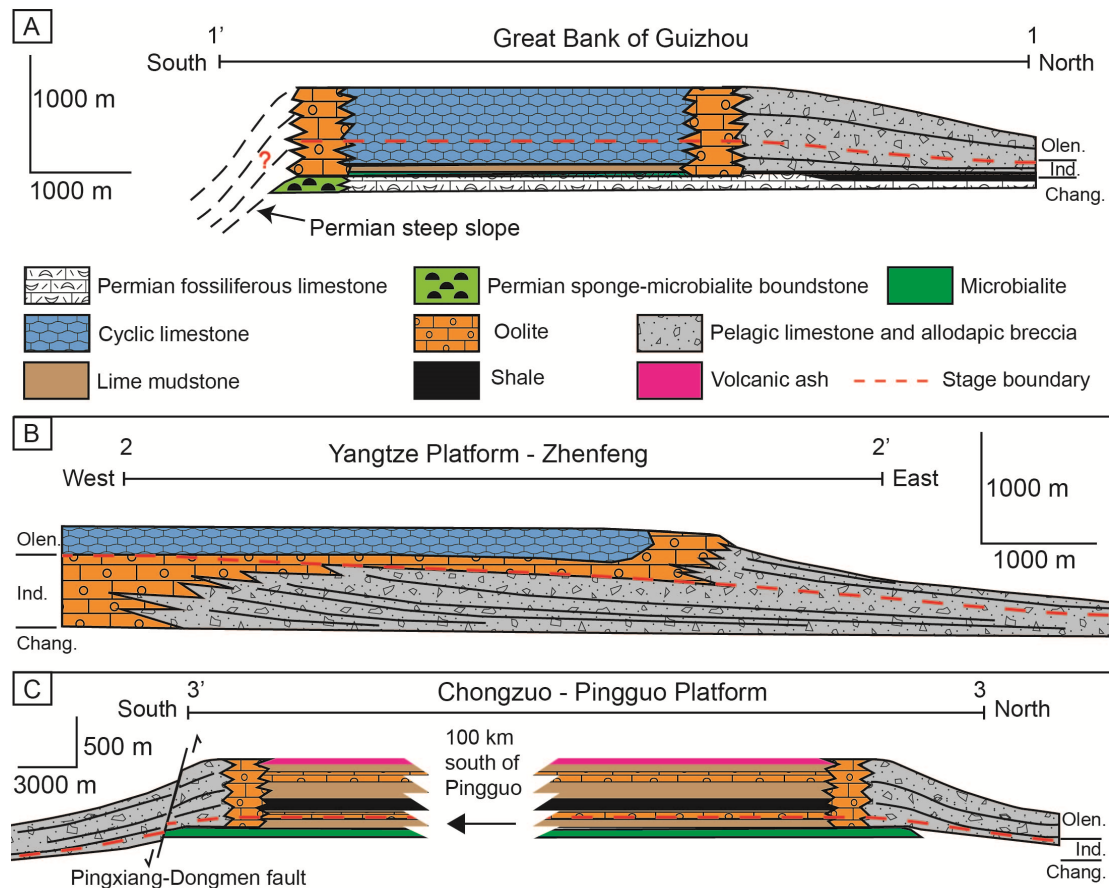

164

165 Figure S1. Schematic Early Triassic architecture of (A) the GBG, (B) the YP at Zhenfeng, and  
 166 (C) the CPP. Modified after Lehrmann et al. (1998, 2012) and Minzoni et al. (2013). The  
 167 geological map of the GBG contains new data from field mapping conducted by X. Li and D.  
 168 Lehrmann, including oolite grainstone deposited above the antecedent topography of the  
 169 southern margin, Upper Permian sponge-microbialite boundstone. Abbreviations of stages:  
 170 Chang. = Changhsingian (Upper Permian), Ind. = Induan (Lower Triassic), Olen. = Olenekian  
 171 (Lower Triassic). Ooids are developed at the platform margin of the GBG, YP, and CPP in the  
 172 Early Triassic, but giant ooids have been only reported from middle-upper Griesbachian, middle-  
 173 upper Dienerian, upper Smithian, and upper Spathian (Li et al., 2015; Tian et al., 2015; Fang et  
 174 al., 2017; also see Fig. 2D).

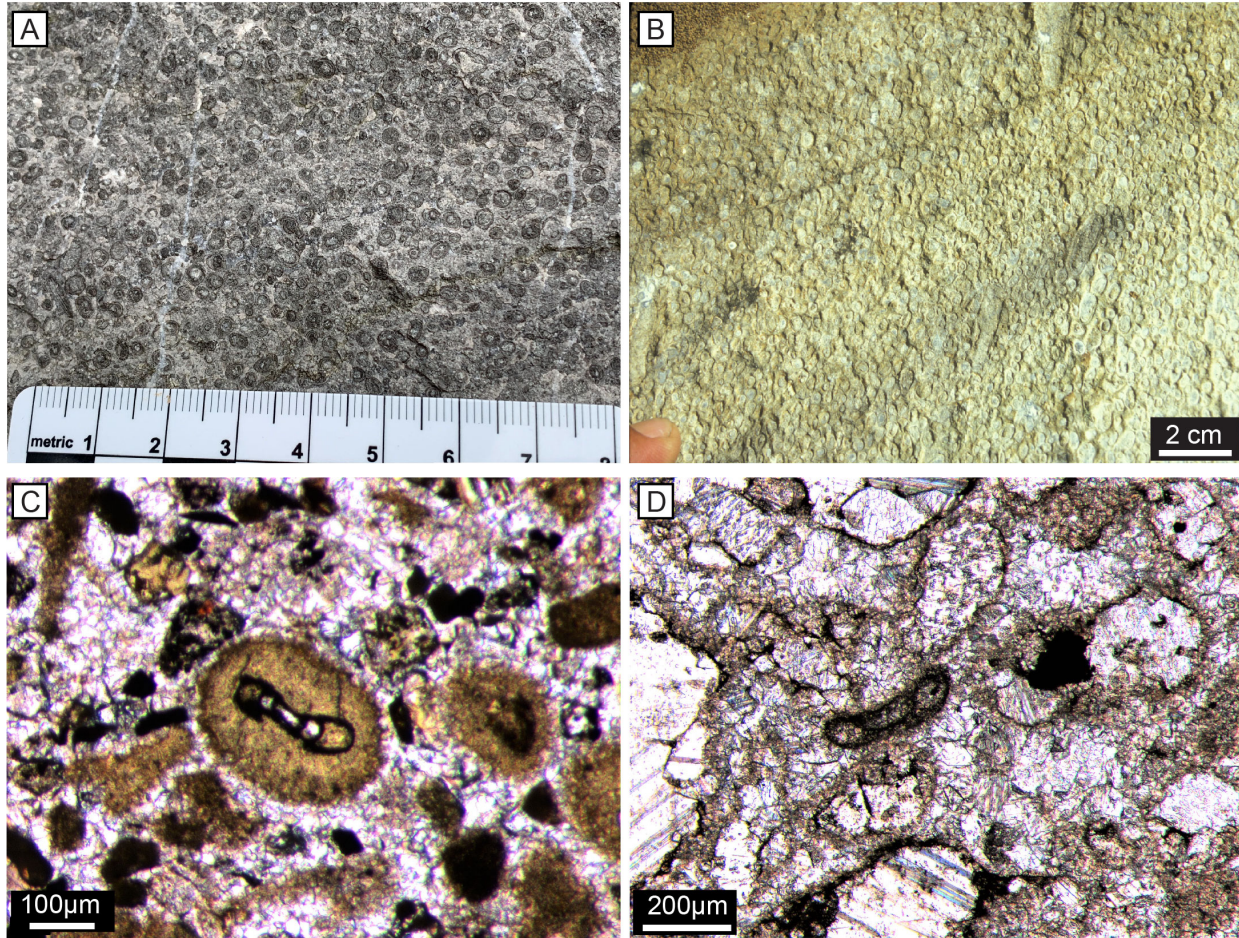

175

176 Figure S2. Outcrop of the Lower Triassic giant ooids and photomicrographs of foraminifers. A:  
 177 An outcrop image of giant ooids at the Zhenfeng margin of the Yangtze Platform. B: An outcrop  
 178 image displaying giant ooids from the northern margin of Chongzuo-Pingguo Platform. C:  
 179 Foraminifer *Postcladella grandis* of Griesbachian age, present in sample M1 from Zhenfeng of  
 180 Yangtze Platform. D: Foraminifer *Postcladella* of Griesbachian to Dienerian age, found in sample  
 181 DXR-3 from the Great Bank of Guizhou.

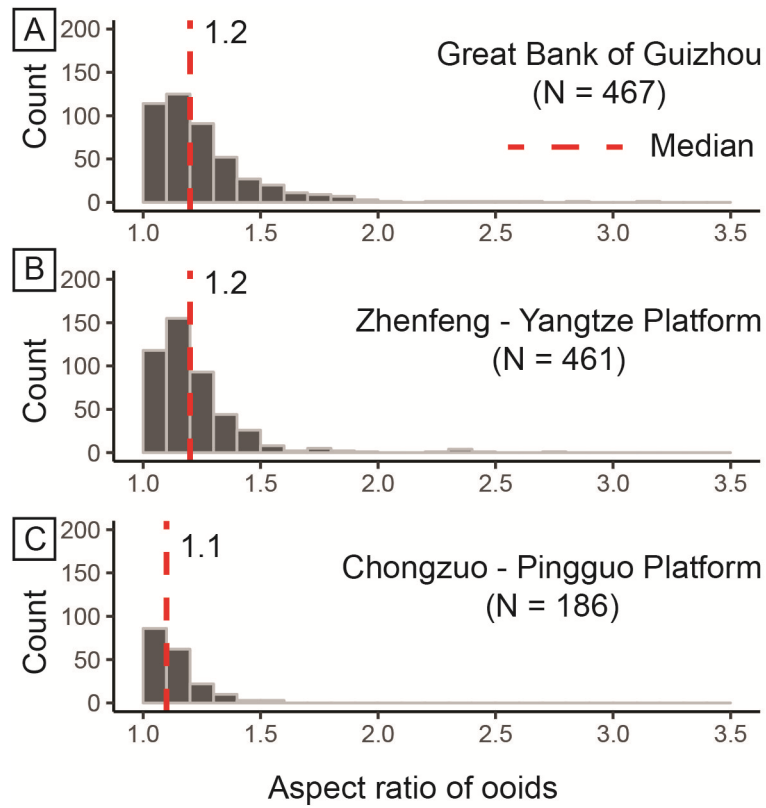

182

183 Figure S3. Aspect ratios of Early Triassic giant ooids from the GBG (A), YP (B), and CPP (C),  
 184 showing values consistent with saltation or suspension transport rather than rolling or sliding as  
 185 the transport modes of giant ooids (Sipos et al., 2018).

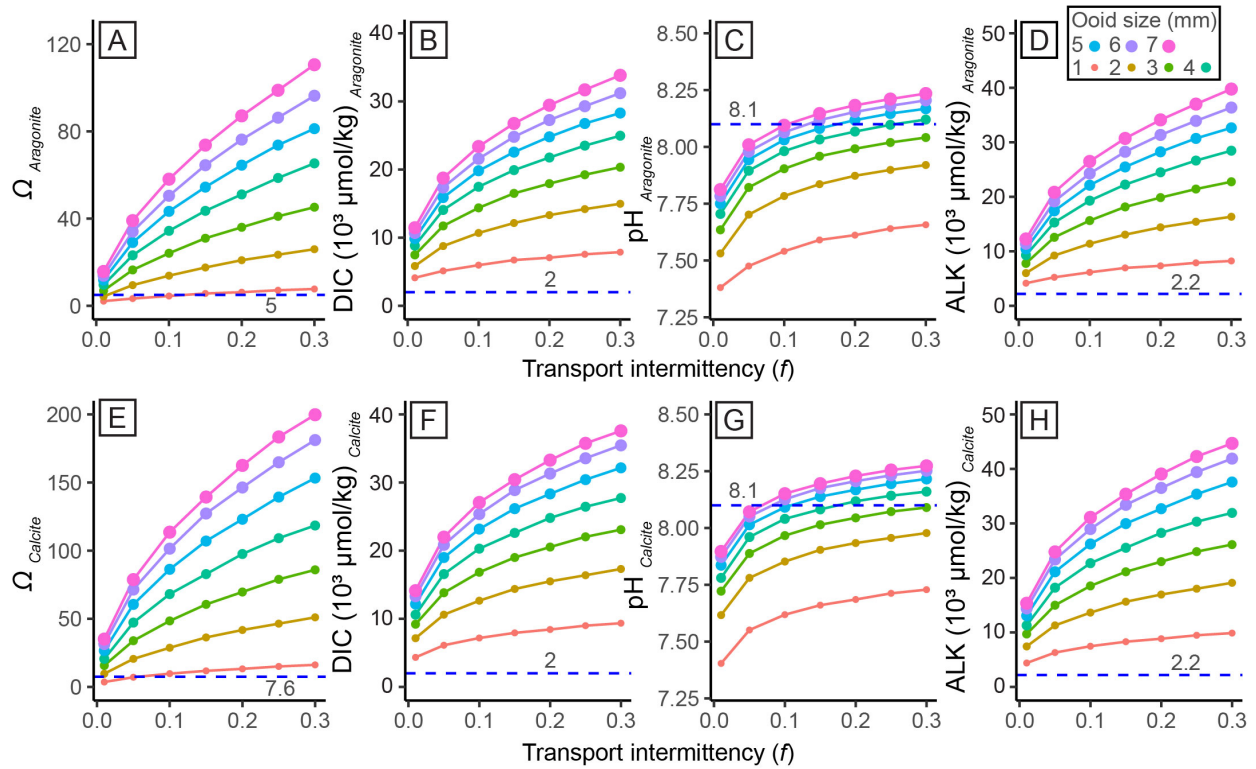

186

187 Figure S4. Modeling results of chemical properties of seawater chemistry required for giant ooid  
 188 formation at 25°C. Horizontal dashed lines represent modern tropical long-term average values  
 189 of surface seawater from the Little Bahamas Bank, Turks and Caicos Islands, and tropical open  
 190 ocean (Bustos-Serrano et al., 2009; Jiang et al., 2015; Trower et al., 2018). Values of kinetic  
 191 parameters of aragonite and calcite precipitation at 25°C are lower than at 37°C (Table 1 in  
 192 Burton and Walter, 1987; also see Fig. 3A to H for comparison). A-D represent results assuming  
 193 an aragonite polymorph ( $k = 40.6 \mu\text{mol}/\text{m}^2/\text{hr}$ ,  $n = 1.7$ ,  $p\text{CO}_2 = 4000 \text{ ppm}$ ); E-H represent results  
 194 assuming a calcite polymorph ( $k = 3.9 \mu\text{mol}/\text{m}^2/\text{hr}$ ,  $n = 1.9$ ,  $p\text{CO}_2 = 4000 \text{ ppm}$ ). A: Aragonite  
 195 saturation state ( $\Omega_{\text{Aragonite}}$ ). B: Dissolved inorganic carbon ( $\text{DIC}_{\text{Aragonite}}$ ). C: Acidity ( $\text{pH}_{\text{Aragonite}}$ ).  
 196 D: Total alkalinity ( $\text{ALK}_{\text{Aragonite}}$ ). E: Calcite saturation state ( $\Omega_{\text{Calcite}}$ ). The value of modern  
 197 calcite saturation state (7.6) is converted from aragonite saturation state ( $\sim 5$ ) in modern tropical

198 ocean based on (Mucci, 1983). F: Dissolved inorganic carbon ( $\text{DIC}_{\text{Calcite}}$ ). G: Acidity ( $\text{pH}_{\text{Calcite}}$ ).  
 199 H: Total alkalinity ( $\text{ALK}_{\text{Calcite}}$ ).

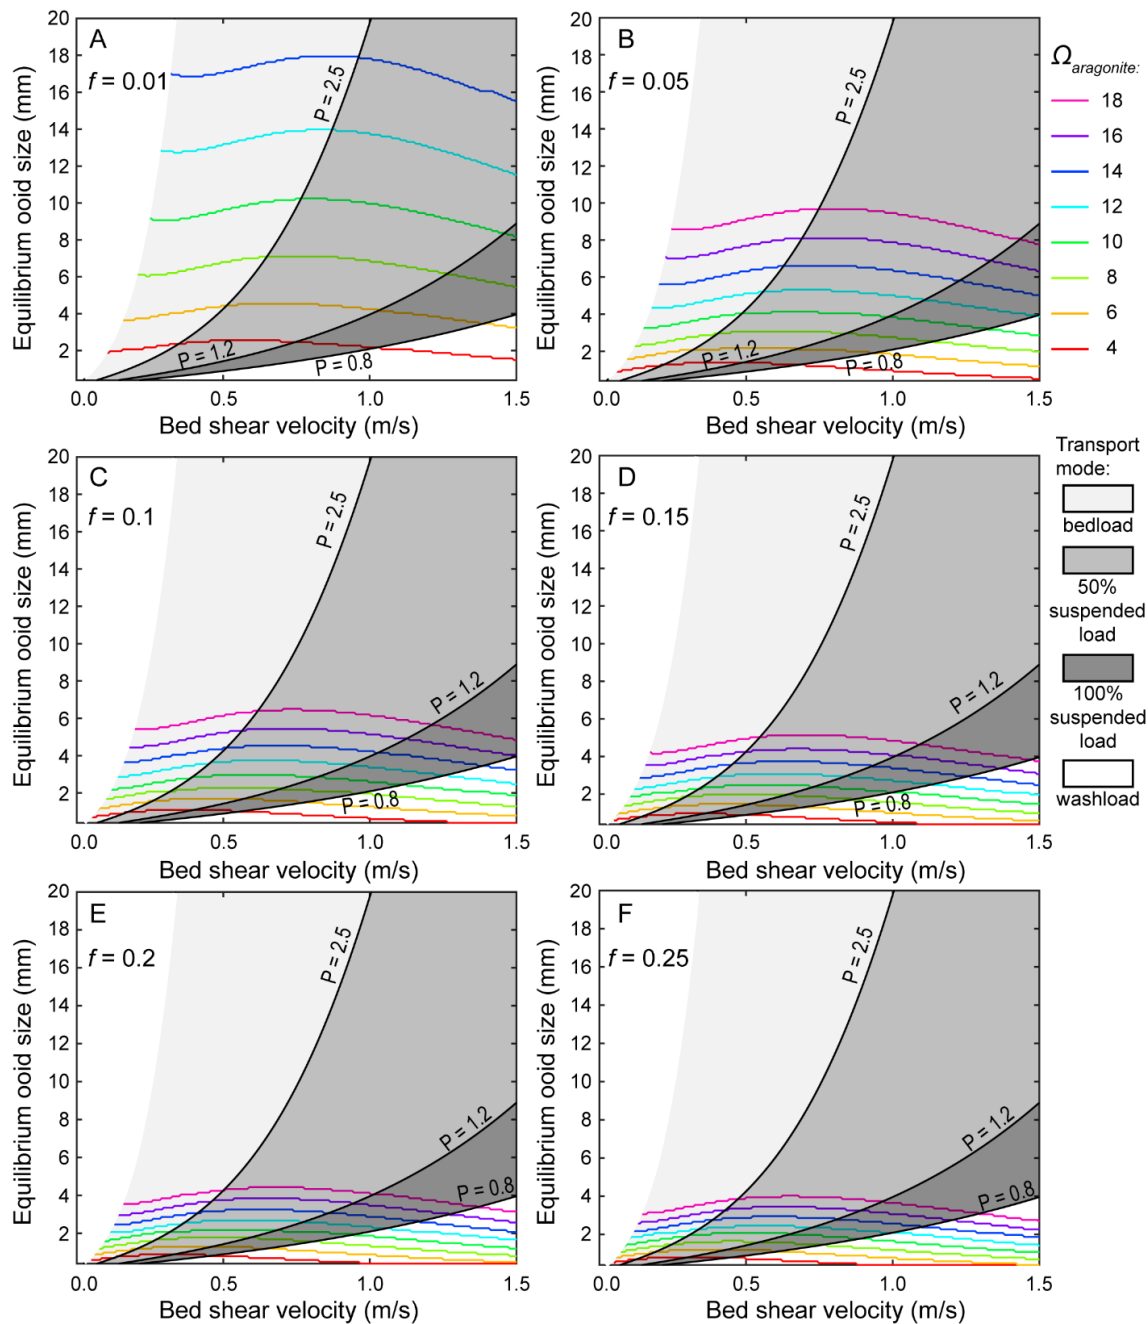

200  
 201 Figure S5. Predicted equilibrium ooid size versus bed shear velocity ( $u_*$ ) for a range of aragonite  
 202 saturation state ( $\Omega_{\text{Aragonite}}$ ) and transport intermittency ( $f$ ) when temperature is at 36 °C. Transport

203 modes are indicated by Rouse number curve ( $P$ , black curves). The model predicts that  
 204 equilibrium ooid size can be increased by increasing  $\Omega_{\text{Aragonite}}$ , decreasing  $f$ , or getting  $u^*$   
 205 approach closer to or at the threshold of suspension.

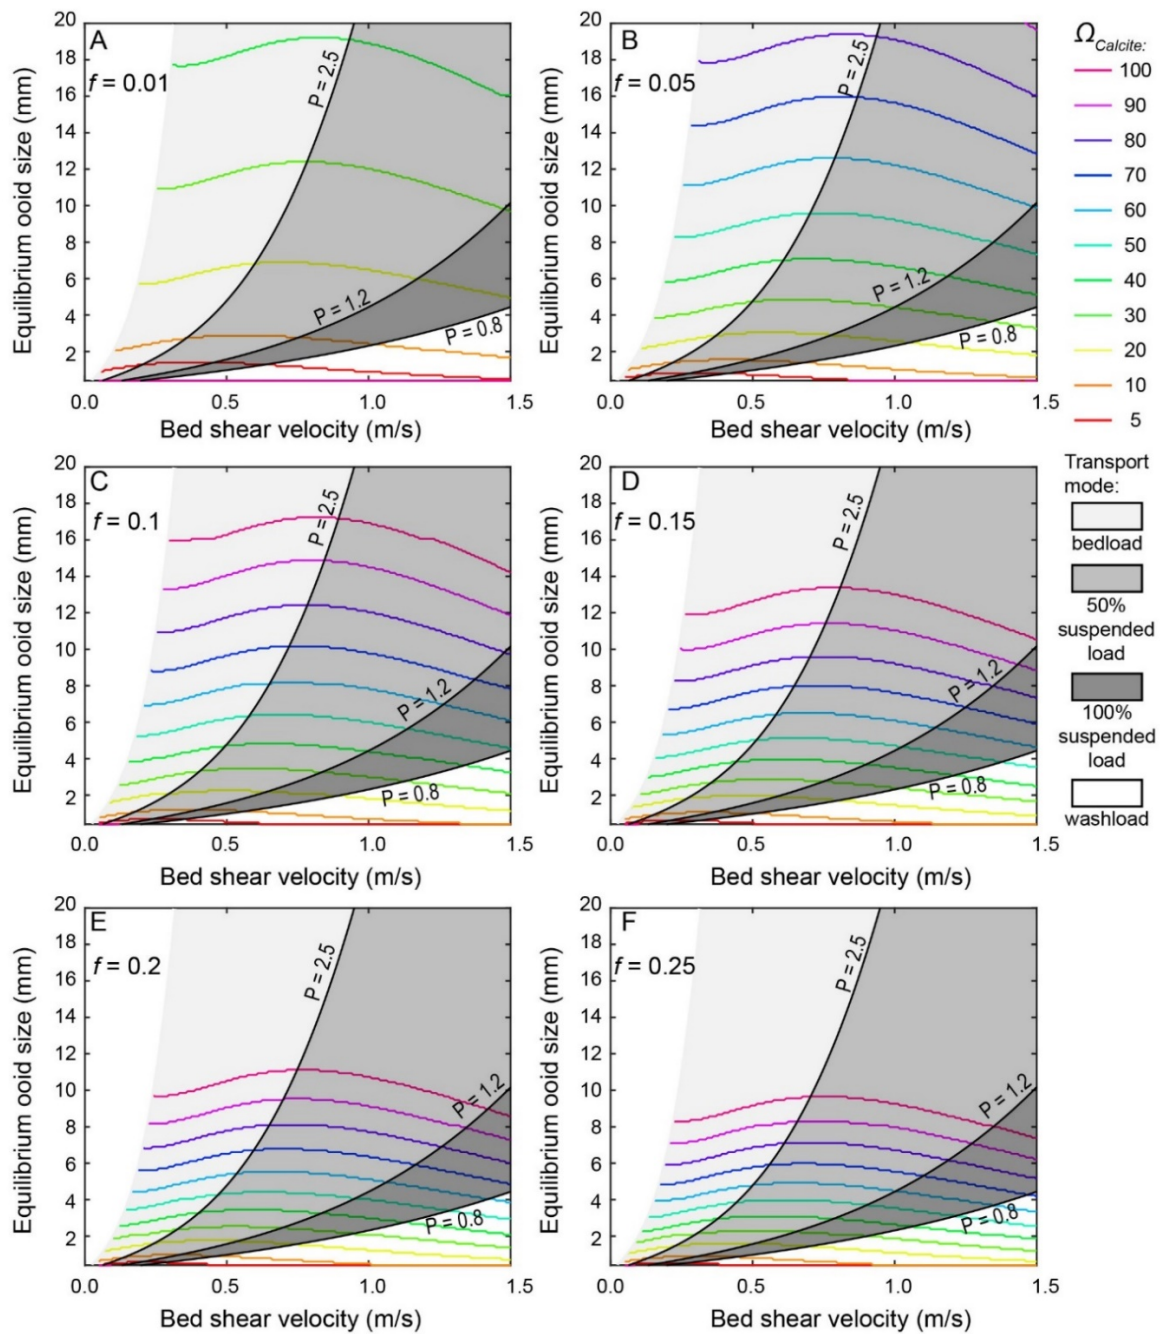

Figure S6. Predicted equilibrium ooid size vs. bed shear velocity ( $u_*$ ) for a range of calcite saturation state ( $\Omega_{\text{Calcite}}$ ) and transport intermittency ( $f$ ) when temperature is at 36 °C. Transport modes are indicated by Rouse number curve (P, black curves). The model predicts that equilibrium ooid size can be increased by increasing  $\Omega_{\text{Calcite}}$ , decreasing  $f$ , or getting  $u_*$  approach closer to or at the threshold of suspension.

## REFERENCES CITED

- Berenbrock, C., and Tranmer, A.W., 2008, Simulation of flow, sediment transport, and sediment mobility of the Lower Coeur d'Alene River, Idaho: U.S. Geological Survey Scientific Investigations Report 2008-5093, 43 p.
- Burton, E.A., and Walter, L.M., 1987, Relative precipitation rates of aragonite and Mg calcite from seawater: Temperature or carbonate ion control? *Geology*, v. 15, p. 111–114, doi:10.1130/0091-7613(1987)15<111:RPROAA>2.0.CO;2.
- Bustos-Serrano, H., Morse, J.W., and Millero, F.J., 2009, The formation of whittings on the Little Bahama Bank: *Marine Chemistry*, v. 113, p. 1–8, doi:10.1016/j.marchem.2008.10.006.
- Dietrich, W.E., 1982, Settling velocity of natural particles: *Water Resources Research*, v. 18, p. 1615–1626, doi:10.1029/WR018i006p01615.
- El-Dessouky, H.T., and Ettouney, H.M., 2002, *Fundamentals of salt water desalination*: Elsevier Science B.V., 525–564 p.
- Fang, Y., Chen, Z.Q., Kershaw, S., Li, Y., and Luo, M., 2017, An Early Triassic (Smithian) stromatolite associated with giant ooid banks from Lichuan (Hubei Province), South China:

228 Environment and controls on its formation: *Palaeogeography, Palaeoclimatology,*  
229 *Palaeoecology*, v. 486, p. 108–122, doi:10.1016/j.palaeo.2017.02.006.

230 Hay, W.W., Migdisov, A., Balukhovsky, A.N., Wold, C.N., Flögel, S., and Söding, E., 2006,  
231 Evaporites and the salinity of the ocean during the Phanerozoic: Implications for climate,  
232 ocean circulation and life: *Palaeogeography, Palaeoclimatology, Palaeoecology*, v. 240, p.  
233 3–46, doi:10.1016/j.palaeo.2006.03.044.

234 Jiang, L., Feely, R.A., Carter, B.R., Greeley, D.J., Gledhill, D.K., and Arzayus, K.M., 2015,  
235 Climatological distribution of aragonite saturation state in the global oceans: *Global*  
236 *Biogeochemical Cycles*, p. 1656–1673, doi:10.1002/2015GB005198.

237 Kelley, B.M., 2014, Physical, chemical, and biological controls on the stratigraphic evolution  
238 and spatial variability of an isolated carbonate platform [Ph.D. thesis]: Stanford University,  
239 1–51 p.

240 Lehrmann, D.J. et al., 2007, Impact of differential tectonic subsidence on isolated carbonate-  
241 platform evolution: Triassic of the Nanpanjiang Basin, south china: *AAPG Bulletin*, v. 91, p.  
242 287–320, doi:10.1306/10160606065.

243 Lehrmann, D.J., Minzoni, M., Li, X., Yu, M., Payne, J.L., Kelley, B.M., Schaal, E.K., and Enos,  
244 P., 2012, Lower Triassic oolites of the Nanpanjiang Basin, south China: Facies architecture,  
245 giant ooids, and diagenesis-implications for hydrocarbon reservoirs: *AAPG Bulletin*, v. 96,  
246 doi:10.1306/01231211148.

247 Lehrmann, D.J., Wei Jiayong, and Enos, P., 1998, Controls on facies architecture of a large  
248 Triassic carbonate platform; the Great Bank of Guizhou, Nanpanjiang Basin, south China:  
249 *Journal of Sedimentary Research*, v. 68, p. 311–326, doi:10.2110/jsr.68.311.

250 Li, F., Yan, J., Chen, Z.Q., Ogg, J.G., Tian, L., Korngreen, D., Liu, K., Ma, Z., and Woods, A.D.,  
 251 2015, Global oolite deposits across the Permian-Triassic boundary: A synthesis and  
 252 implications for palaeoceanography immediately after the end-Permian biocrisis: *Earth-*  
 253 *Science Reviews*, v. 149, p. 163–180, doi:10.1016/j.earscirev.2014.12.006.

254 Li, X., Yu, M., Lehrmann, D.J., Payne, J.L., Kelley, B.M., and Minzoni, M., 2012, Factors  
 255 controlling carbonate platform asymmetry: Preliminary results from the Great Bank of  
 256 Guizhou, an isolated Permian-Triassic Platform in the Nanpanjiang Basin, south China:  
 257 *Palaeogeography, Palaeoclimatology, Palaeoecology*, v. 315–316, p. 158–171,  
 258 doi:10.1016/j.palaeo.2011.11.023.

259 Minzoni, M. et al., 2013, Triassic tank: Platform margin and slope architecture in space and time,  
 260 Nanpanjiang Basin, south China, *in* Verwer, K., Playton, T.E., and Harris, P.M. (Mitch) eds.,  
 261 *Deposits, Architecture, and Controls of Carbonate Margin, Slope and Basinal Settings*,  
 262 *SEPM Special Publication 105*, p. 84–113, doi:10.2110/sepmsp.105.10.

263 Morse, J.W., Arvidson, R.S., and Lüttge, A., 2007, Calcium carbonate formation and dissolution:  
 264 *Chemical Reviews*, v. 107, p. 342–381, doi:10.1021/cr050358j.

265 Mucci, A., 1983, The solubility of calcite and aragonite in seawater at various salinities,  
 266 temperatures, and one atmosphere total pressure: *American Journal of Science*, v. 283, p.  
 267 780–799, doi:10.2475/ajs.283.7.780.

268 Sipos, A.A., Domokos, G., and Jerolmack, D.J., 2018, Shape evolution of ooids: A geometric  
 269 model: *Scientific Reports*, v. 8, p. 1–7, doi:10.1038/s41598-018-19152-0.

270 Sun, Y., Joachimski, M.M., Wignall, P.B., Yan, C., Chen, Y., Jiang, H., Wang, L., and Lai, X.,  
 271 2012, Lethally hot temperatures during the Early Triassic greenhouse: *Science*, v. 338, p.

272 366–370, doi:10.1126/science.1224126.

273 Tian, L., Bottjer, D.J., Tong, J., Li, F., Yang, T., Song, H., Song, H., and Liang, L., 2015,  
274 Distribution and size variation of ooids in the aftermath of the Permian–Triassic mass  
275 extinction: *Palaios*, v. 30, p. 714–727, doi:10.2110/palo.2014.110.

276 Trower, E.J. et al., 2018, Active ooid growth driven by sediment transport in a high-energy shoal,  
277 Little Ambergris Cay, Turks and Caicos Islands: *Journal of Sedimentary Research*, v. 88, p.  
278 1–20, doi:10.2110/jsr.2018.59.

279 Trower, E.J., Lamb, M.P., and Fischer, W.W., 2017, Experimental evidence that ooid size  
280 reflects a dynamic equilibrium between rapid precipitation and abrasion rates: *Earth and*  
281 *Planetary Science Letters*, v. 468, p. 112–118, doi:10.1016/j.epsl.2017.04.004.

282 Walter, L.M., and Morse, J.W., 1984, Reactive surface area of skeletal carbonates during  
283 dissolution: Effect of grain size: *Journal of Sedimentary Research*, v. 54, p. 1081–1090,  
284 doi:10.1306/212f8562-2b24-11d7-8648000102c1865d.

285 Zhong, S., and Mucci, A., 1989, Calcite and aragonite precipitation from seawater solutions of  
286 various salinities: Precipitation rates and overgrowth compositions: *Chemical Geology*, v.  
287 78, p. 283–299, doi:10.1016/0009-2541(89)90064-8.

288
